# Supplementary material for: Predicting 90-Day Mortality in Locoregionally Advanced Head and Neck Squamous Cell Carcinoma after Curative Surgery
Source: MDPI journal article supplement (doi:10.3390/cancers10100392), 2018-10-22
Supplement: s1 [file s1]

# Supplementary Materials: Predicting 90-Day Mortality in Locoregionally Advanced Head and Neck Squamous Cell Carcinoma after Curative Surgery

Lei Qin; Yi-Wei Kao; Tsung-Ming Chen; Kuan-Chou Lin; Kevin Sheng-Po Yuan; Alexander T.H. Wu; Ben-Chang Shia and Szu-Yuan Wu

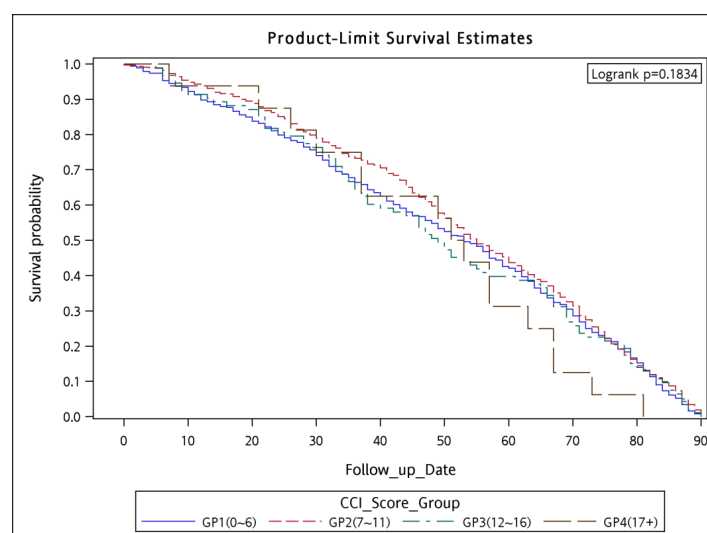

**Figure S1.** Kaplan–Meier curves for 90-day survival in patients with locoregionally advanced head and neck squamous cell carcinoma receiving curative-surgery associated with the four risk groups from Charlson Comorbidity Index. Note: *p*-value of Log Rank Test is <0.1834.

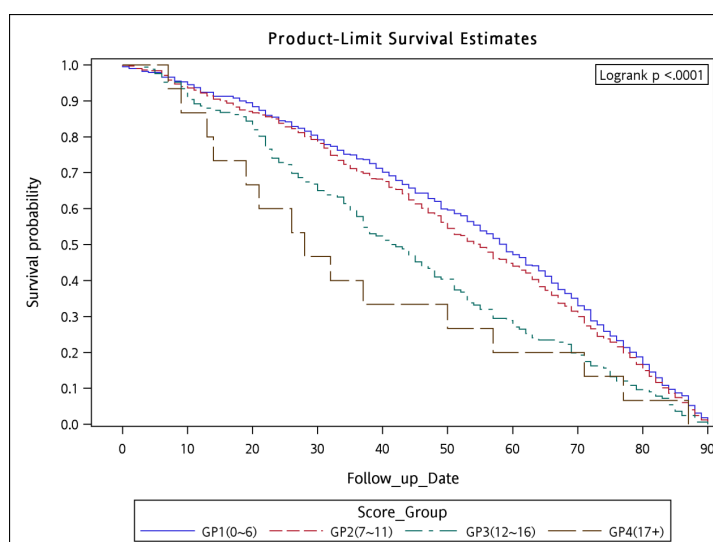

**Figure S2.** Kaplan–Meier curves for 90-day survival in patients with locoregionally advanced head and neck squamous cell carcinoma receiving curative-surgery associated with the four risk groups from Wu comorbidity score. Note: *p*-value of Log Rank Test is <0.0001.

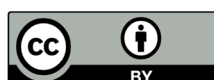

© 2018 by the authors. Licensee MDPI, Basel, Switzerland. This article is an open access article distributed under the terms and conditions of the Creative Commons Attribution (CC BY) license (<http://creativecommons.org/licenses/by/4.0/>).
